# Supplementary material
Source: PubMed Central journal article supplement (PMC3754497)
Supplement: CVI.00028-13_zcd999094805so1.pdf [file CVI.00028-13_zcd999094805so1.pdf]

TABLE S1. Clinical presentation by serotype among 87 invasive *H. influenzae* strains isolated in Italy during the years 2009-2011.

| Diagnosis    | ncHi (%)  | Encapsulated (%) |          |          |          |
|--------------|-----------|------------------|----------|----------|----------|
|              |           | Hib              | Hie      | Hif      | Total    |
| Meningitis   | 26 (38.8) | 2 (33.3)         | 2 (40.0) | 2 (22.2) | 6 (30.0) |
| Bacteremia   | 34 (50.8) | 3 (50.0)         | 1 (20.0) | 4 (44.5) | 8 (40.0) |
| Pneumonia    | 7 (10.4)  | 0                | 2 (40.0) | 3 (33.3) | 5 (25.0) |
| Epiglottitis | 0         | 1 (16.7)         | 0        | 0        | 1 (5.0)  |
| Total        | 67        | 6                | 5        | 9        | 20       |

Table S2. Antimicrobial susceptibility of 87 *H. influenzae* strains isolated in Italy during the years 2009-2011.

| Antibiotic      | MIC ( $\mu\text{g/ml}$ ) |                   |                   | Susceptibility category |                        |
|-----------------|--------------------------|-------------------|-------------------|-------------------------|------------------------|
|                 | MIC <sub>50</sub>        | MIC <sub>90</sub> | range             | S (%)                   | R (%)                  |
| Ampicillin      | 0.25                     | 48                | 0.094- $\geq$ 256 | 74 (85.1)               | 13 (14.9) <sup>a</sup> |
| Azythromycin    | 3                        | 6                 | 0.38- $\geq$ 256  | 77 (88.5)               | 10 (11.5)              |
| Cefotaxime      | 0.016                    | 0.032             | 0.016-0.19        | 86 (98.9)               | 1 (1.1)                |
| Chloramphenicol | 0.5                      | 0.75              | 0.19-8            | 83 (95.4)               | 4 (4.6)                |
| Ciprofloxacin   | 0.012                    | 0.016             | 0.004-0.5         | 87 (100)                | 0.0                    |

<sup>a</sup> 11 strains were  $\beta$ -lactamase producers, 2 strain were  $\beta$ -lactamase negative ampicillin resistant (BLNAR).
